# Supplementary material for: Distribution of Natural Trace Elements in Drinking Water Sources of Hungary
Source: Preprints.org preprint supplement (doi:10.20944/preprints202406.2052.v1), 2024-07-02
Supplement: Supplementary file 1 [file supplementary]

Electronic Supplementary Material to the paper

**Distribution of natural trace elements in drinking water sources of Hungary**

***Bálint Izsák, Katalin Hegedűs-Csondor, Petra Baják, Anita Erőss, Norbert Erdélyi, Márta Vargha***

**Figure S1** Dendogram of water samples by hierarchical cluster analysis


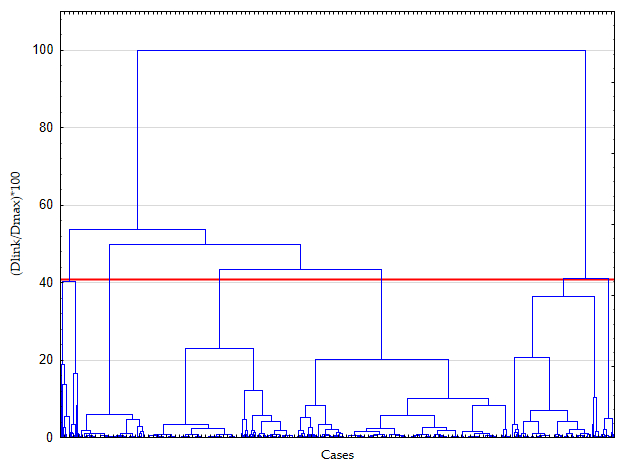


| **Principal component** | | **Eigenvalues** | | --- | | | **% Total variance** | | --- | | | **Cumulative %** | | --- | |
| --- | --- | --- | --- | --- | --- | --- |
| 1 | 2,825868 | 21,73744 | 21,73744 |
| 2 | 1,887558 | 14,51968 | 36,25712 |
| 3 | 1,537639 | 11,82799 | 48,08511 |
| 4 | 1,160101 | 8,92385 | 57,00896 |
| 5 | 1,086953 | 8,36118 | 65,37014 |

**Table S1** Eigen values of the principal component analysis

|  | **Loading value** | | | | |
| --- | --- | --- | --- | --- | --- |
| **Variable** | **PC1** | **PC2** | **PC3** | **PC4** | **PC5** |
| **B** | **-0.63** | 0.31 | 0.09 | 0.2 | 0.29 |
| **Ba** | -0.12 | 0.35 | **-0.62** | -0.32 | -0.04 |
| **Ca** | **0.79** | 0.00 | -0.09 | 0.26 | 0.09 |
| **K** | 0.11 | **0.65** | 0.16 | 0.38 | -0.37 |
| **Li** | -0.18 | **0.66** | -0.01 | 0.24 | -0.20 |
| **Mg** | **0.75** | 0.32 | -0.14 | 0.02 | 0.25 |
| **Mo** | -**0.42** | 0.13 | 0.22 | 0.14 | 0.50 |
| **Na** | -**0.75** | 0.36 | -0.06 | -0.02 | 0.19 |
| **Se** | 0.28 | 0.29 | **0.51** | **-0.46** | 0.18 |
| **Sr** | 0.32 | **0.59** | **-0.43** | -0.22 | 0.02 |
| **Ti** | 0.35 | -0.06 | -0.21 | **0.55** | **0.50** |
| **U** | 0.35 | 0.34 | **0.57** | -0.28 | 0.23 |
| **V** | 0.11 | 0.07 | **0.46** | 0.29 | -0.36 |

**Table S2** PC’s loading values of the elements (relevant elements with a loading value: >0.4 or <-0.4 are indicated in **bold**)
